# Supplementary material for: Asphyxia in the Newborn: Evaluating the Accuracy of ICD Coding, Clinical Diagnosis and Reimbursement: Observational Study at a Swiss Tertiary Care Center on Routinely Collected Health Data from 2012-2015
Source: PLoS One. 2017 Jan 24;12(1):e0170691. doi: 10.1371/journal.pone.0170691 (PMC5261744; doi:10.1371/journal.pone.0170691)
Supplement: S1 Data — (XLSX) [file pone.0170691.s010.xlsx]

## Sheet: Tabelle1
Case.Nr	Cod. Orig	Cod. KHB.2016	Cod.Matrix	pH applied	BE applied	Lactate applied	Apgar 1	Apgar 5	Apgar 10	UA pH	pH cap/v/vNpH	UA BE	UV BE	UA BE Std	UV BE Std	BE Std cap	BE Std art	BE Std ven	Lactate cap	Lactate art	Lactate ven	Costs
1	P20.1	P21.9	Norm	aN pH	n/a	n/a	9	9	9	7.32												2524.51
2	P20.1	P21.9	Norm	aN pH	BE Std UV	n/a	8	9	9	7.19			-2		-2							2331.34
3	P20.1	P21.9	Norm	aN pH	BE Std ven	n/a	8	9	9	7.24		0	0	2	1							3033.85
4	P20.9	P21.1	P21.1	pH Kind/vNpH	BE Std ven	Lactate ven	3	7	9		7.05		-2		-1			-6.4			7.4	543576
5	P21.1	P21.9	P21.9	aN pH	BE UV	n/a	4	7	8	7.33		1	1	2	2							38141.6
6	P20.1	P21.9	Norm	pH Kind/vNpH	BE Std UV	n/a	7	8	9		7.37		-3		-3							2415.26
7	P21.0	P21.9	P20	aN pH	BE Std cap	Lactate ven	2	8	9	7.02						-9.7					10.4	31101.9
8	P20.1	P21.9	Norm	aN pH	BE Std UV	n/a	7	8	9	7.32			-2		-2							2505.3
9	P20.1	P21.9	P20	aN pH	n/a	n/a	8	8	9	7.13												1451.72
10	P21.1	P21.9	Norm	n/a	BE Std cap	lactate cap	7	8	8		7.27					-7.4			8.4			131222
11	P21.0	P21.9	P21.9	aN pH	BE Std art	Lactate art	3	6	6	7.26		-4	-4	-2	-4		-8.7			6.1		117634
12	P20.1	P21.9	Norm	aN pH	n/a	n/a	7	9	9	7.31												2995.01
13	P21.1	P21.9	Norm	pH Kind/vNpH	BE Std ven	Lactate ven	6	8	9		7.16	-1	-1	0	0			-5.7			5.1	55205.5
14	P20.9	P21.0	P21.0	pH Kind/vNpH	BE UA	Lactate ven	1	3	5		6.99	-11	-9	-7	-7			-10.6			12.9	84932.8
15	P21.1	P21.9	Norm	aN pH	BE Std ven	Lactate ven	6	8	10	7.32		2	2	3	2			1			3.1	26022.8
16	P20.1	P21.9	P20	aN pH	BE UA	lactate cap	6	8	9	7.05		-11	-9	-8	-6	-5.6			5.7			2635.85
17	P20.1	P21.9	Norm	pH Kind/vNpH	BE Std UV	n/a	8	9	10		7.41		-4		-5							1984.63
18	P20.1	P21.9	P21.9	aN pH	BE UA	n/a	5	7	8	7.22		-7	-6	-6	-6							2632.18
19	P20.1	P21.9	P20	aN pH	n/a	lactate cap	6	8	9	7.04									9.7			2160.89
20	P21.1	P21.1	P21.1	pH Kind/vNpH	BE UV	Lactate ven	5	7	8		7.08	-5	-6	-2	-3			-5.4			6.9	26369.4
21	P21.1	P21.9	P20	aN pH	BE UA	n/a	4	9	9	7.08	7.19	-10	-8	-7	-7							2062.75
22	P21.0	P21.9	P21.1	pH Kind/vNpH	BE Std ven	Lactate art	0	2	6		7.08					-3.4		-9	4.8	7.3	2.8	38203.1
23	P20.1	P21.9	Norm	aN pH	BE UV	n/a	7	8	10	7.23		-6	-6	-4	-5							3794.93
24	P20.1	P21.9	Norm	aN pH	BE Std UV	n/a	8	9	9	7.31			-1		-2							2232.47
25	P20.1	P21.9	Norm	aN pH	BE UV	n/a	7	8	9	7.3		0	-1	1	0							3518.57
26	P20.1	P21.1	P21.1	pH Kind/vNpH	BE Std ven	Lactate ven	3	5	5		7.07	-3	-3	-1	-2			-5.2			4.8	12051.4
27	P20.1	P21.9	P21.9	pH Kind/vNpH	BE UA	Lactate ven	5	7	8		7.24	-2	-1	0	-1			-1.7			2.7	31470
28	P20.1	P21.9	Norm	pH Kind/vNpH	BE Std UV	n/a	8	8	9		7.46		2		1							5504.82
29	P20.1	P21.9	P21.1	aN pH	n/a	n/a	1	1	5	7.32												30562.5
30	P21.0	P21.1	P21.1	pH Kind/vNpH	BE UA	Lactate ven	3	7	8		6.99	-15		-10				-12.1			17	59783.7
31	P20.1	P21.9	Norm	aN pH	BE Std ven	n/a	9	10	10	7.33		0	0	1	0							6870.38
32	P20.1	P21.9	P20	aN pH	n/a	n/a	9	10	10	7.13												2731.55
33	P20.1	P21.9	Norm	aN pH	BE Std ven	n/a	9	9	10	7.29		0	0	2	1							3787.18
34	P20.1	P21.9	P21.9	aN pH	BE UV	lactate cap	2	5	8	7.22			-7		-6				12			1613.47
35	P21.1	P21.9	P21.9	pH Kind/vNpH	BE Std ven	Lactate ven	5	7	9		7.17	1	1	2	2			-0.5			5	93434.1
36	P21.0	P21.9	Norm	pH Kind/vNpH	BE Std ven	Lactate ven	2	8	10		7.2	-1	-1	0	-1			-5			5.9	69758
37	P20.1	P21.9	P21.1	aN pH	BE Std cap	lactate cap	2	4	6	7.29	7.39					-4.6			4.4			2979.33
38	P21.1	P21.0	P21.0	pH Kind/vNpH	BE Std ven	Lactate ven	4	8	8		7							-16.3			16	44986.7
39	P21.0	P21.9	Norm	aN pH	BE Std cap	lactate cap	7	8	8	7.29		-1	-1	1	0	-2			3.3			46647.5
40	P20.1	P21.9	Norm	aN pH	BE Std UV	n/a	8	9	9	7.27		-4	-6	-3	-6							1532.67
41	P20.1	P21.9	Norm	pH Kind/vNpH	BE Std ven	Lactate ven	4	8	8		7.41		0		-1			-5.1			4.9	40658.5
42	P20.1	P21.9	P20	aN pH	BE UV	lactate cap	7	8	9	7.13			-10		-9	-6.8			6.4			1565.09
43	P20.1	P21.9	P20	aN pH	BE UA	n/a	7	8	9	6.94		-18	-15	-13	-11							2676.15
44	P21.0	P21.9	P21.9	pH Kind/vNpH	BE Std ven	Lactate ven	3	7	9		7.15							-1.6			3.7	26615.5
45	P21.0	P21.9	P21.9	pH Kind/vNpH	BE Std UV	Lactate ven	5	6	7		7.16	1	-3	2	-3			-1.7			3.8	237547
46	P20.1	P21.9	Norm	aN pH	BE UV	n/a	7	9	10	7.22			-3		-2							3346.55
47	P20.0	P21.1	P21.1	aN pH	BE UV	lactate cap	2	7	8	7.07		-12	-12	-9	-10				15			57272.6
48	P21.0	P21.1	P21.1	pH Kind/vNpH	BE Std ven	Lactate ven	0	7	8		7.02							-12.9			11.5	7694.57
49	P20.1	P21.0	P21.0	aN pH	BE UA	Lactate ven	2	4	7	7		-12	-7	-7	-5			-11.6			12.8	11959.4
50	P21.1	P21.9	P20	aN pH	BE UA	lactate cap	7	8	9	7.1		-12	-11	-9	-10				5.3			1837.77
51	P20.1	P21.9	P20	aN pH	BE UA	lactate cap	3	9	9	7.07		-8				0.5			3.8			6059.65
52	P21.0	P21.9	Norm	pH Kind/vNpH	BE UA	lactate cap	3	8	8		7.21	-2	1	0	2				5.2			20219.1
53	P20.1	P21.9	Norm	aN pH	BE Std UV	n/a	8	9	9	7.43			3		2							2141.77
54	P21.0	P21.9	Norm	aN pH	BE UV	lactate cap	3	9	10	7.22			-6		-5				3.5			2913.96
55	P20.1	P21.1	P21.1	aN pH	BE UA	lactate cap	2	6	9	6.93		-13							5.3			8096.96
56	P21.1	P21.9	Norm	aN pH	BE Std ven	Lactate ven	7	8	9	7.33		0	0	2	1			-0.2			2.4	90580.4
57	P21.0	P21.1	P21.1	aN pH	BE Std ven	Lactate ven	1	6	7	7.03								-15.8			12.5	18144.6
58	P20.1	P21.9	Norm	pH Kind/vNpH	n/a	n/a	8	9	10		7.38											2424.84
59	P20.1	P21.9	P21.9	aN pH	BE UA	n/a	3	6	9	7.3		-1	0	0	0							81356.1
60	P20.1	P21.9	P21.9	aN pH	BE UA	n/a	3	7	10	7.16		-9	-8	-7	-7							31683.5
61	P20.0	P21.0	P21.0	aN pH	BE Std cap	lactate cap	0	2	4	6.9						-9.9			20			94806.4
62	P20.1	P21.9	P20	aN pH	BE UA	lactate cap	9	10	10	7.07		-16				-2.6			3.1			9096.2
63	P21.1	P21.9	Norm	aN pH	BE Std UV	n/a	7	8	9	7.31		-1	-1	1	-1							3826.62
64	P20.1	P21.9	Norm	aN pH	BE Std cap	n/a	7	8	8	7.23						-1.4						20648.2
65	P21.0	P21.9	P21.9	pH Kind/vNpH	BE Std ven	Lactate ven	5	6	6		7.3							-2.3			1.6	158036
66	P20.9	P21.1	P21.1	pH Kind/vNpH	BE Std UV	lactate cap	7	7	7		7.07	-4	-4	-4	-4	-2.6			2.2			50539.6
67	P20.1	P21.9	Norm	aN pH	BE Std UV	n/a	8	8	9	7.26		-6	-7	-5	-8							2283.67
68	P21.0	P21.9	P21.9	pH Kind/vNpH	BE UV	n/a	2	7	9		7.2	-1	-2	-1	-1							206227
69	P21.1	P21.9	Norm	aN pH	BE Std UV	n/a				7.36		-1	-2	-1	-2							1427.77
70	P20.1	P21.9	P21.9	aN pH	BE UV	lactate cap	3	5	7	7.22		-3	-3	-1	-2	-2.7			4.7			4140.28
71	P20.1	P21.9	Norm	aN pH	BE UA	n/a	8	8	9	7.28		-3		-2								2612.44
72	P20.1	P21.0	P21.0	aN pH	BE UA	lactate cap	4	2	1	6.99		-16							3			56524
73	P21.0	P21.1	P21.1	pH Kind/vNpH	BE Std UV	lactate cap	3	6	9		7.072	-1	-9	0	-11	-6.1			5.7			60559.1
74	P21.0	P21.9	P21.1	aN pH	n/a	lactate cap	2	4	5	7.15									2.8			14885.7
75	P21.0	P21.0	P21.0	aN pH	BE Std cap	lactate cap	1	3	5	6.7						-26			4.8			28890.8
76	P21.1	P21.9	P21.9	aN pH	BE UV	n/a	4	3	10	7.24		-5	-5	-3	-3							3497.82
77	P21.1	P21.9	Norm	aN pH	BE Std UV	n/a	6	8	8	7.28			1		1							2583.13
78	P21.0	P21.1	P21.1	pH Kind/vNpH	BE Std cap	n/a	2	5	7		7.12					-12						47225.5
79	P20.9	P21.1	P21.1	aN pH	BE Std cap	n/a	6	7	8	7.14						-3.2						13118.8
80	P20.1	P21.9	P20	aN pH	BE UV	lactate cap	3	8	9	7.12			-4		-2				3.4			2364.19
81	P20.1	P21.9	P21.9	pH Kind/vNpH	BE Std ven	Lactate ven	3	7	9		7.23	0	0	2	1			-0.5			2.1	25894.5
82	P21.0	P21.9	P21.1	pH Kind/vNpH	BE Std ven	Lactate ven	2	3	6		7.09							-2.2			8.2	40441.2
83	P20.1	P21.9	Norm	pH Kind/vNpH	n/a	n/a	8	8	9		7.26											2639.75
84	P20.1	P21.1	P21.1	aN pH	BE UA	lactate cap	4	6	6	6.99		-11							2.7			3555.5
85	P20.1	P21.9	Norm	aN pH	BE Std UA	n/a	7	8	9	7.32		-8	-4	-8	-3							1031.92
86	P20.1	P21.9	Norm	aN pH	BE Std UV	n/a	8	10	10	7.38		-2	-3	-2	-5							2648.15
87	P20.1	P21.1	P21.1	pH Kind/vNpH	BE Std ven	Lactate ven	4	7	8		7.1	-3	-2	-3	-3			-7.4			7.3	85557.7
88	P20.1	P21.9	Norm	aN pH	BE Std cap	lactate cap	3	8	8	7.19						-3.2			10.5			10269.2
89	P21.0	P21.1	P21.1	pH Kind/vNpH	BE Std cap	Lactate ven	2	4	7		6.95	-11	-10	-8	-8	-13.1					9.5	9111.86
90	P21.0	P21.9	P21.1	pH Kind/vNpH	BE Std cap	n/a	0	2	7		7.04					-8.4						29196.2
91	P21.1	P21.9	P20	pH Kind/vNpH	BE UA	Lactate ven	7	9	9		6.93	-12	-10	-8	-8						14.9	125743
92	P20.9	P21.9	Norm	aN pH	BE Std ven	Lactate ven	8	9	9	7.29								-4.8			3	14211.4
93	P20.1	P21.9	Norm	aN pH	BE Std UV	Lactate art	9	10	10	7.21		-6	-7	-4	-7					3		12062.1
94	P21.0	P21.1	P21.1	pH Kind/vNpH	BE UA	n/a	1	6	7		7.13	-3		-2		-2.7						145255
95	P21.1	P21.9	P21.9	aN pH	BE Std UA	Lactate ven	5	6	6	7.27		-14	-1	-15	-1			-3			3.8	144634
96	P20.1	P21.9	P21.9	aN pH	BE Std cap	lactate cap	7	7	9	7.36		0	0	0	-1	-6.2			4.3			61300.2
97	P20.1	P21.9	Norm	aN pH	BE UV	n/a	9	9	10	7.24		-2	-2	0	-1							1996.99
98	P21.1	P21.9	P20	aN pH	BE UA	lactate cap	6	9	9	7.14		-8	-7	-5	-6				4.3			3585.96
99	P20.1	P21.9	P20	aN pH	BE Std cap	lactate cap	5	8	8	7.08	7.19					-5.9			7.5			1617.77
100	P20.1	P21.9	Norm	aN pH	BE Std UV	n/a	8	9	9	7.15			-4		-4							4264.2
101	P21.1	P21.9	Norm	pH Kind/vNpH	BE Std ven	Lactate ven	7	9	9		7.18							-6			2.9	67523.6
102	P20.1	P21.9	P20	aN pH	BE UA	n/a	9	10	10	7.13		-10	-5	-7	-6							2596.3
103	P20.1	P21.9	P21.1	aN pH	n/a	n/a	5	3	4	7.06												14252.1
104	P21.1	P21.9	Norm	aN pH	BE Std cap	lactate cap	7	8	9	7.29		-1	-2	0	-2	-3.3			2.2			12347.1
105	P20.1	P21.9	P20	aN pH	BE UA	n/a	9	9	9	7.12		-10		-7								4089.72
106	P20.1	P21.9	P20	aN pH	BE UV	lactate cap	8	9	9	7.13			-9		-8	-2.8			3.9			14332
107	P21.1	P21.9	P21.9	pH Kind/vNpH	BE Std ven	Lactate ven	5	7	8		7.19	1	0	3	1			-5.1			7.4	80045.4
108	P20.1	P21.9	Norm	aN pH	BE UA	lactate cap	8	8	9	7.17		-11	-10	-9	-10				2.2			12162.9
109	P20.1	P21.9	P21.9	aN pH	BE Std ven	Lactate ven	5	6	7	7.37		-1	0	-1	-1			-4.1			4.1	126522
110	P21.1	P21.9	Norm	aN pH	BE Std UV	Lactate ven	7	8	9	7.32		0	-6	1	-8			-0.2			3.6	18335.4
111	P20.9	P21.9	Norm	aN pH	BE Std ven	Lactate ven	7	8	8	7.23		-7		-5				-8.7			7.8	31604.3
112	P20.1	P21.9	Norm	aN pH	BE UV	n/a	9	10	10	7.19		-4	-4	-1	-3							2387.02
113	P20.1	P21.9	P21.1	aN pH	BE UA	n/a	1	1	4	7.07		-12										63907
114	P21.0	P21.9	P21.1	aN pH	n/a	n/a	2	3	6	7.28												16146.7
115	P21.0	P21.1	P21.1	aN pH	BE UA	lactate cap	4	7	8	7.09		-9	-6	-5	-4	-5.4			11.9			42914.7
116	P20.1	P21.9	Norm	pH Kind/vNpH	BE UV	n/a	9	10	10		7.3		-3		-2							1972.99
117	P21.0	P21.9	P21.9	aN pH	BE Std ven	Lactate ven	3	4	9	7.22		-6	-5	-4	-4	-8.7		-10.7	6.2		8.9	193797
118	P20.1	P21.9	Norm	aN pH	BE UV	n/a	9	10	10	7.19		-9	-9	-7	-8							1055.1
119	P20.1	P21.0	P21.0	pH Kind/vNpH	BE Std ven	Lactate ven	1	3	3		6.95							-14.7			14.7	358930
120	P20.1	P21.9	Norm	aN pH	BE Std UV	n/a	8	8	9	7.32		-1	-2	0	-2							1771.09
121	P20.1	P21.9	Norm	aN pH	BE UA	Lactate ven	4	9	10	7.23		-2	-1	1	0			-1.3			4.5	12166.5
122	P20.1	P21.9	Norm	aN pH	BE Std UV	n/a	7	9	9	7.26		-8	-10	-8	-10							1938.69
123	P21.0	P21.1	P21.1	aN pH	BE Std UV	lactate cap	1	7	8	6.98		-16	-14	-12	-16				5.6			4675.92
124	P20.1	P21.9	Norm	aN pH	BE Std ven	n/a	8	9	10	7.28			0		0							1302.74
125	P20.1	P21.9	Norm	aN pH	BE UA	n/a	9	10	10	7.2		-8		-6								1309.16
126	P20.1	P21.1	P21.1	aN pH	BE Std cap	lactate cap	3	4	7	7.04						-2.5			2.6			12862.4
127	P20.1	P21.9	Norm	aN pH	BE Std UV	n/a	9	9	10	7.27		-3	-4	-2	-4							2192.32
128	P20.1	P21.9	P21.9	aN pH	BE UA	n/a	2	2	5	7.17		-3										10630.7
129	P20.1	P21.9	Norm	aN pH	n/a	n/a	9	9	10	7.35												22980.8
130	P20.1	P21.9	Norm	aN pH	BE Std UA	n/a	9	9	10	7.3		-2	-2	-2	-1							1621.96
131	P20.1	P21.9	Norm	n/a	n/a	n/a	9	9	10	7.25	7.47	-2										1275.18
132	P20.1	P21.9	P20	aN pH	n/a	lactate cap	6	8	9	6.99									2.9			11506.7
133	P21.1	P21.9	Norm	pH Kind/vNpH	BE Std ven	Lactate ven	6	8	9		7.17	-3	-5	-2	-5			-6.8			4.7	19195.5
134	P20.1	P21.9	P20	aN pH	BE Std cap	lactate cap	8	9	9	7.14		-7	-7	-4	-5	-8			9.5			15736.3
135	P21.0	P21.9	P21.9	aN pH	BE Std UV	Lactate ven	1	3	5	7.29		0		2	-4.4						6.7	195180
136	P20.1	P21.9	P20	aN pH	BE UA	lactate cap	8	9	10	7.12	7.29	-25		-23		-11.8			13			11452.8
137	P20.1	P21.9	Norm	pH Kind/vNpH	BE Std UV	Lactate ven	7	9	10		7.23	2	1	4	1			1.8			3.1	23066.3
138	P21.0	P21.1	P21.1	pH Kind/vNpH	BE Std cap	lactate cap	2	5	7		7.1					-10			10.6			15906.3
139	P20.1	P21.1	P21.1	aN pH	BE Std art	Lactate art	5	7	7	7.01							-1.9			2.9		9427.57
140	P20.1	P21.0	P21.0	aN pH	n/a	n/a	3	5	8	6.92												51738.4
141	P20.1	P21.9	P20	aN pH	BE UA	lactate cap	6	8	8	7.12		-11	-8	-8	-7	-7.6			5.1			7858.65
142	P20.1	P21.9	Norm	aN pH	BE UA	n/a	8	9	10	7.29		-1		0								2962.42
143	P20.1	P21.9	Norm	aN pH	BE Std UV	n/a	9	10	10	7.3		-2	-3	-1	-3							2359.59
144	P20.1	P21.9	Norm	aN pH	BE UV	n/a	9	9	10	7.34		1	1	2	2							2759.25
145	P20.1	P21.9	Norm	aN pH	BE UA	n/a	8	9	10	7.21		-8	-6	-6	-6							1804.86
146	P21.0	P21.0	P21.0	pH Kind/vNpH	BE Std cap	lactate cap	0	4	6		6.92	-15	-3	-10	-2	-16.2			16			147302
147	P21.0	P21.0	P21.0	pH Kind/vNpH	BE UV	lactate cap	1	0	0		7	-13	-14			-12.1			14.3			63972.6
148	P21.9	P21.9	P21.9	pH Kind/vNpH	BE Std cap	n/a	6	7	8		7.16					-19						12455
149	P21.0	P21.9	P20	aN pH	BE Std ven	Lactate ven	3	8	9	7.11		-10	-11	-8	-9			-12.1			12.6	47050.4
150	P21.0	P21.1	P21.1	aN pH	BE UA	lactate cap	2	5	7	7.14		-4	-2	-1	0				2.5			68773.3
151	P21.1	P21.9	P21.9	aN pH	BE Std cap	n/a	5	6	8	7.15						-9.8						23343.2
152	P21.0	P21.1	P21.1	pH Kind/vNpH	BE Std ven	Lactate ven	1	4	6		7.07	-7		-5				-9.7			12.7	209337
153	P20.1	P21.1	P21.1	aN pH	n/a	n/a	3	7	8	7.12												1786.4
154	P21.0	P21.9	P21.1	aN pH	BE Std ven	Lactate ven	1	3	4	7.12								-3.2			8.3	162531
155	P20.1	P21.9	Norm	aN pH	n/a	n/a	8	8	9	7.29												1370.14
156	P20.1	P21.0	P21.0	aN pH	BE Std cap	lactate cap	2	3	7	6.76						-22			18			20518.3
157	P20.1	P21.1	P21.1	pH Kind/vNpH	BE Std ven	Lactate ven	2	6	9		7.14	-1	-1	-1	0			-6			6.6	29919.8
158	P20.1	P21.9	Norm	aN pH	BE UA	n/a	7	8	9	7.26		-3	-1	-2	-1							1949.84
159	P20.1	P21.9	Norm	aN pH	BE Std UV	n/a	8	9	10	7.22		-9	-10	-8	-11							2042.52
160	P21.0	P21.0	P21.0	pH Kind/vNpH	BE Std cap	lactate cap	0	3	6		6.77					-18			15			77274.5
161	P21.0	P21.9	not_assoc	n/a	BE Std cap	lactate cap	2	2	2							-8.3			15			16126.2
162	P20.1	P21.9	P20	pH Kind/vNpH	BE Std art	Lactate art	1	8	10		6.98						-14			10		14664.9
163	P20.1	P21.9	Norm	aN pH	BE UA	n/a	9	9	10	7.16		-6	-5	-3	-4							3179.99
164	P20.0	P21.0	P21.0	pH Kind/vNpH	n/a	lactate cap	7	5	4		6.92								19			15034.7
165	P20.1	P21.9	P21.9	aN pH	BE UA	n/a	6	7	8	7.31		-4		-3								2927.61
166	P20.1	P21.9	Norm	aN pH	BE UA	n/a	9	9	10	7.2		-3	-1	-1	-1							2028.96
167	P20.1	P21.0	P21.0	pH Kind/vNpH	BE Std art	Lactate art	1	3	8		6.96	-12	-8	-9	-6		-13.6			12.8		10655.6
168	P21.0	P21.9	not_assoc	n/a	n/a	n/a	0	4	7		6.98					-5.7						699690
169	P20.1	P21.0	P21.0	pH Kind/vNpH	BE Std ven	Lactate ven	1	3	5		6.99	-13	-12	-10	-10			-14			12.1	21650
170	P21.1	P21.9	Norm	aN pH	BE Std ven	Lactate ven	7	8	9	7.26		-1	0	1	1			-6.1			5.7	25574.8
171	P21.1	P21.9	P21.9	aN pH	BE UA	lactate cap	7	7	8	7.18		-7	-4	-4	-4	-5.2			3.3			7075.77
172	P20.1	P21.9	Norm	aN pH	BE Std ven	n/a	8	9	10	7.34		0	0	1	0							2405.83
173	P20.1	P21.9	Norm	aN pH	BE Std UV	n/a	8	9	10	7.31		-3	-3	-3	-4							1635.18
174	P20.1	P21.9	Norm	aN pH	BE UV	n/a	9	10	10	7.3		-1	-2	0	-1							1917.47
175	P20.1	P21.9	P20	aN pH	BE UA	Lactate ven	8	10	10	7.13	7.19	-6	-4	-3	-2			-5.6			8.8	40836
176	P21.1	P21.9	Norm	aN pH	BE UV	n/a	7	8	9	7.15		-8	-8	-6	-6							5455.5
177	P21.0	P21.1	P21.1	pH Kind/vNpH	BE Std cap	lactate cap	3	4	3		7.03					-14.5			13.93			15689.8
178	P21.1	P21.9	P21.9	pH Kind/vNpH	BE UV	lactate cap	4	6	9		7.18	0	-1	2	0	0.8			2.3			13449.6
179	P20.1	P21.9	P21.9	aN pH	BE UA	n/a	4	6		7.38		-4										81312.6
180	P20.1	P21.9	Norm	aN pH	BE Std UV	n/a	8	9	9	7.23		-5	-5	-4	-5							2684.05
181	P20.1	P21.9	Norm	aN pH	BE Std UV	n/a	8	9	10	7.31		-3	-4	-2	-4							16450.9
182	P20.1	P21.1	P21.1	pH Kind/vNpH	BE Std ven	Lactate ven	6	7	9		7.09							-9.9			7.2	17192.4
183	P21.0	P21.9	P21.9	aN pH	BE UA	n/a	2	7	9	7.15		-9	-7	-6	-6							1652.68
184	P20.1	P21.9	Norm	aN pH	BE UA	n/a	8	9	10	7.17		-7	-6	-4	-6							16409.9
185	P21.1	P21.9	Norm	aN pH	BE Std UV	lactate cap	6	8	9	7.35		0	0	0	-1				0.9			58545.3
186	P20.1	P21.9	P21.9	aN pH	BE UA	lactate cap	2	6	8	7.15		-10	-6	-8	-4				2.3			15943.5
187	P21.0	P21.0	P21.0	pH Kind/vNpH	BE UA	lactate cap	1	5	7		6.96	-16							11			46650.5
188	P20.1	P21.1	P21.1	pH Kind/vNpH	BE Std cap	lactate cap	1	4	6		7.094					-12.4			11.2			7590.36
189	P21.0	P21.9	P21.9	aN pH	BE Std ven	lactate cap	3	7	9	7.3		0	0	2	1				1.2			11102
190	P20.1	P21.0	P21.0	pH Kind/vNpH	BE Std cap	n/a	5	5	5		6.67					-26						34219.7
191	P20.1	P21.9	Norm	aN pH	BE UA	n/a	8	9	10	7.27		-2	0	0	-1							2216.97
192	P21.0	P21.1	P21.1	pH Kind/vNpH	BE Std cap	n/a	2	4	5		6.9					-14.9						8512.39
193	P21.1	P21.1	P21.1	pH Kind/vNpH	BE Std ven	Lactate ven	6	6	8		7.04	-2	-1	-1	-1			-9.6			4.6	18204.1
194	P21.1	P21.9	P21.9	pH Kind/vNpH	BE Std cap	lactate cap	5	7	8		7.27	-3	-2	-2	-2	-3.3			1.6			18946.2
195	P21.1	P21.9	P20	aN pH	BE Std UV	n/a	7	10	10	7.14		-10	-10	-8	-10							2348.09
196	P21.0	P21.9	P21.1	aN pH	n/a	n/a	1	5	9	7.16												15731.5
197	P21.0	P21.9	P21.9	aN pH	BE Std ven	Lactate ven	3	6	10	7.33		0	-1	1	-1			-5.4			5	75877.4
198	P21.0	P21.9	P21.9	aN pH	n/a	lactate cap	3	6	7	7.24									3.4			60806.3
199	P20.1	P21.9	P20	aN pH	BE UA	lactate cap	8	8	9	6.96		-19	-17	-15	-14	-7.8			9			2503.5
200	P20.1	P21.9	P20	aN pH	BE Std cap	lactate cap	8	9	9	6.97						-1.3			4.3			14989.3
201	P21.0	P21.9	P21.1	pH Kind/vNpH	BE Std ven	Lactate ven	1	3	4		6.96	1	-1	4	0			-4.8			7.2	169797
202	P21.1	P21.9	P21.9	pH Kind/vNpH	BE UA	Lactate ven	4	6	8		7.16	3		4							4.8	8916.27
203	P20.1	P21.1	P21.1	aN pH	BE Std cap	n/a	6	7	8	7.03						1.8						9617.55
204	P21.1	P21.1	P21.1	aN pH	BE UA	n/a	6	7	7	6.94		-14.9										4069.71
205	P20.1	P21.9	Norm	aN pH	n/a	n/a	9	9	9	7.28												49359.4
206	P20.1	P21.9	P20	aN pH	BE UA	lactate cap	7	8	8	7		-14	-10	-9	-7	-3.9			5.8			2439.11
207	P21.1	P21.9	P20	aN pH	BE UA	Lactate ven	6	8	9	7.03		-12	-11	-8	-7			-11.4			2.7	7928.09
208	P21.1	P21.9	P21.9	aN pH	BE Std ven	Lactate ven	7	6	9	7.36			-1		-2			-3.8			2.7	39311.3
209	P20.1	P21.1	P21.1	aN pH	n/a	n/a	3	5	8	7.01												15651.4
210	P21.0	P21.9	P21.9	aN pH	BE UA	n/a	3	7	8	7.19		-1										11539.9
211	P20.1	P21.9	P21.9	aN pH	BE Std ven	Lactate ven	4	6	8	7.31		-1	-3	1	-2			-3.9			3.5	5367.79
212	P21.0	P21.9	P21.9	aN pH	BE UA	Lactate ven	2	3	8	7.21		-20	-16	-19	-18			-5.1			5.7	47683.1
213	P21.0	P21.1	P21.1	pH Kind/vNpH	BE Std ven	Lactate ven	1	6	7		6.95		-8		-7			-12.9			9.3	101815
214	P20.1	P21.9	Norm	aN pH	BE Std UV	n/a	8	9	9	7.16			-5		-5							2178.86
215	P20.1	P21.9	Norm	aN pH	BE UV	n/a	8	9	9	7.33		-1	-1	0	0							3361.89
216	P21.0	P21.9	P21.9	aN pH	BE Std ven	Lactate ven	1	6	9	7.24		-2		0				-3.5			5.2	102430
217	P20.1	P21.9	Norm	aN pH	BE Std UV	n/a	8	9	9	7.22		-5	-5	-3	-5							2074.07
218	P21.1	P21.9	P21.9	aN pH	BE Std UV	lactate cap	4	5	6	7.32		-2	-5	-1	-6	-3.5			1.4			5421.29
219	P20.1	P21.9	Norm	aN pH	BE UA	Lactate ven	9	10	10	7.15		-8.4						-1.7			2.7	12808.2
220	P21.0	P21.0	P21.0	aN pH	BE UA	n/a	2	7	8	6.8		-18				-14						43609.6
221	P20.1	P21.0	P21.0	pH Kind/vNpH	BE UA	Lactate ven	2	4	8		6.9	-16	-15	-10	-10			-13			10.9	63641
222	P21.1	P21.0	P21.0	aN pH	BE Std cap	n/a	7	9	10	6.96						-16						27770.7
223	P20.1	P21.9	Norm	aN pH	BE Std UV	n/a	8	10	10	7.27		-4	-4	-3	-4							3008.04
224	P21.1	P21.9	Norm	aN pH	BE Std cap	lactate cap	5	8	8	7.16						-7.1			8.2			63088
225	P21.0	P21.9	P20	pH Kind/vNpH	n/a	lactate cap	8	9	9		6.6								22			149512
226	P20.1	P21.9	Norm	aN pH	BE Std UV	Lactate ven	6	9	9	7.23		-8	-9	-7	-9			-5.4			5.8	5241.09
227	P20.1	P21.9	Norm	aN pH	BE UA	n/a	9	10	10	7.24		-9	-7	-8	-8							2499.06
228	P20.1	P21.9	P20	aN pH	n/a	n/a	9	9	10	7.14												15010.3
229	P21.1	P21.1	P21.1	aN pH	BE Std cap	n/a	6	6	8	7						-13.6						16061.7
230	P21.0	P21.9	P21.9	aN pH	BE Std cap	lactate cap	2	2	4	7.39		1	0	1	0	-6.2			6.1			60664.9
231	P20.1	P21.9	Norm	aN pH	n/a	n/a	7	8	9	7.27												2322.9
232	P20.1	P21.9	Norm	aN pH	n/a	n/a	7	9	10	7.36												13674
233	P20.1	P21.9	Norm	aN pH	BE Std UV	n/a	7	8	9	7.28		-1	-1	1	-1							3048
234	P21.0	P21.1	P21.1	pH Kind/vNpH	BE Std ven	Lactate ven	3	5	7		7.01	-10	-10	-8	-8			-13.6			11.4	53298.7
235	P20.0	P21.1	P21.1	aN pH	BE UA	Lactate art	4	6	7	6.99		-8		-4						10.6		148422
236	P20.1	P21.9	Norm	aN pH	BE Std UV	n/a	9	10	10	7.29		-4	-4	-3	-5							3433.26
237	P21.0	P21.9	P21.9	aN pH	BE UA	Lactate ven	1	7	9	7.22		-5	-3	-3	-1			-4.8			4.9	34737.8
238	P21.1	P21.9	P21.9	aN pH	n/a	n/a	5	6	8	7.21												18915.8
239	P21.0	P21.9	P21.9	aN pH	BE Std ven	n/a	3	5	9	7.37		0	1	1	0							6169.09
240	P21.1	P21.9	P21.9	aN pH	BE UA	Lactate ven	6	7	8	7.22		-13									1.7	7686.78
241	P21.0	P21.9	Norm	aN pH	BE UA	n/a	3	8	9	7.33		-1	0									11393
242	P21.0	P21.1	P21.1	pH Kind/vNpH	n/a	Lactate ven	3	5	6		6.96										8.9	14147.6
243	P20.1	P21.0	P21.0	pH Kind/vNpH	BE Std cap	n/a	2	4	6		7.05					-16.3						30290
244	P21.0	P21.1	P21.1	pH Kind/vNpH	BE Std ven	n/a	2	7	7		6.85							-13				36846.9
245	P20.0	P21.0	P21.0	aN pH	BE UA	lactate cap	3	2	1	6.92		-13.6							18			78587.2
246	P20.1	P21.9	Norm	pH Kind/vNpH	BE UV	n/a	7	9	10		7.32		-3		-2							2483.24
247	P21.0	P21.9	Norm	aN pH	BE Std ven	Lactate ven	6	9	9	7.34								-1.7			3.4	28507.2
248	P20.1	P21.1	P21.1	pH Kind/vNpH	BE UV	Lactate ven	4	5	7		6.96		-13		-9			-12.4			10.6	5790.67
249	P20.1	P21.9	Norm	pH Kind/vNpH	BE Std UV	n/a	8	10	10		7.37		-5		-5							2880.88
250	P20.1	P21.9	Norm	aN pH	BE UA	n/a	8	9	10	7.21		-7	-6	-6	-6							2590.84
251	P21.0	P21.1	P21.1	aN pH	BE UA	Lactate ven	3	6	7	7.11		-9	-7	-6	-7			-8.3			9.8	13202.7
252	P21.1	P21.9	Norm	pH Kind/vNpH	BE Std cap	lactate cap	6	9	9		7.28					-3.8			2.4			14998.5
253	P20.0	P21.0	P21.0	aN pH	BE UA	lactate cap	0	0	0	6.7		-22.3							14.5			28051.6
254	P20.1	P21.9	Norm	aN pH	n/a	n/a	7	9	10	7.21												3208.54
255	P21.1	P21.1	P21.1	pH Kind/vNpH	BE Std ven	Lactate ven	4	6	7		7.1							-10.5			7	220553
256	P20.1	P21.9	not_assoc	aN pH	n/a	n/a				7.44												30326.8
257	P20.1	P21.9	P20	aN pH	BE Std UA	n/a	8	9	9	6.77		-7	-4	-28	-4							2069.09
258	P20.1	P21.9	P20	pH Kind/vNpH	BE Std ven	Lactate ven	0	8	9		7.11							-5.6			4.2	19929.4
259	P20.1	P21.1	P21.1	pH Kind/vNpH	n/a	n/a	4	7	7		7.09											18303.8
260	P20.1	P21.9	P21.1	aN pH	n/a	n/a	8	9	9	6.93												26467
261	P21.1	P21.9	Norm	aN pH	BE Std ven	Lactate ven	6	9	9	7.25		-4	-3	-2	-2			-5.2			6.2	22964.1
262	P21.0	P21.0	P21.0	aN pH	BE UA	lactate cap	3	4	7	6.95		-19	-17	-15	-14	-13.5			12.1			82736.3
263	P20.1	P21.9	P20	aN pH	BE UA	lactate cap	8	9	10	7.12		-13	-7	-11	-7				5.1			2353.67
264	P21.1	P21.9	Norm	aN pH	BE Std ven	Lactate ven	4	9	9	7.29		-1	0	1	1			-4.8			5.8	78968.4
265	P21.1	P21.9	P20	pH Kind/vNpH	BE Std cap	lactate cap	7	8	10		7.09					1.2			2.7			12873.8
266	P21.1	P21.9	P21.9	pH Kind/vNpH	BE Std ven	Lactate ven	4	7	7		7.16	0	-3	1	-2			-7.4			4.7	11792.7
267	P20.9	P21.9	P21.9	aN pH	BE Std ven	n/a	1	7	10	7.31		0	0	1	1							3054.87
268	P20.9	P21.1	P21.1	pH Kind/vNpH	BE Std cap	lactate cap	6	7	7		6.9		-1		-1	-8.2			4.1			147567
269	P21.0	P21.9	P21.1	pH Kind/vNpH	BE UA	n/a	3	3	6		7.17	-10.9										34929.4
270	P20.1	P21.1	P21.1	aN pH	n/a	Lactate ven	2	5	5	7.042											12.5	64131.8
271	P20.1	P21.9	P21.9	pH Kind/vNpH	BE Std ven	Lactate ven	0	3	8		7.24	1	0	1	0			-5.5			7.1	9978.58
272	P20.1	P21.9	Norm	aN pH	n/a	n/a	8	9	10	7.37												1884.07
273	P20.1	P21.9	Norm	aN pH	n/a	n/a	8	9	9	7.28												1706.73
274	P21.1	P21.9	P21.9	pH Kind/vNpH	BE Std ven	Lactate ven	6	7	9		7.18		0		0			-2.8			2.3	16429.3
275	P21.0	P21.9	P21.9	aN pH	BE Std ven	Lactate ven	2	6	7	7.19		-6	-6	-4	-4			-9			9.3	37038.8
276	P21.1	P21.9	Norm	aN pH	BE Std ven	Lactate ven	7	8	9	7.37								-5.1			4.2	28498.7
277	P20.1	P21.9	P20	aN pH	BE UA	lactate cap	8	9	10	7.13		-9	-5	-6	-4				3.1			2577.66
278	P20.1	P21.9	Norm	aN pH	BE Std UV	n/a	8	9	9	7.32		-2	-2	-1	-3							3523.82
279	P20.1	P21.9	Norm	aN pH	BE UA	n/a	8	8	9	7.25		-5	-3	-3	-4							1611.01
280	P20.1	P21.1	P21.1	aN pH	BE Std cap	n/a	3	6	7	6.78						-18						42017.5
281	P21.0	P21.1	P21.1	aN pH	n/a	Lactate ven	2	6	9	6.97											11.7	41821.3
282	P21.0	P21.1	P21.1	aN pH	n/a	n/a	0	4	4	6.69												25074.9
283	P20.1	P21.0	P21.0	pH Kind/vNpH	BE UA	lactate cap	3	4	9		6.93	-17	-16	-11	-10	-5.5			4.3			2926.08
284	P20.1	P21.1	P21.1	aN pH	BE Std cap	Lactate art	3	5	6	6.98						-11	-6.7			7.7		7485.4
285	P21.9	P21.1	P21.1	aN pH	BE UA	n/a	4	6	8	6.97		-13										14264.5
286	P20.1	P21.0	P21.0	aN pH	BE UA	lactate cap	3	5	8	6.99		-19	-17	-15	-15	-11.5			14.6			3131.75
287	P21.0	P21.9	P21.1	aN pH	BE Std ven	Lactate ven	0	2	5	7.04		-12	-6	-8	-5			-13.7			12.8	23129.5
288	P20.1	P21.9	Norm	aN pH	BE UA	n/a	5	10	10	7.26		-1	2	1	1							2245.04
289	P20.1	P21.9	Norm	aN pH	BE Std UV	n/a	7	9	10	7.37		0	-1	0	-2							1854.63
290	P20.1	P21.9	Norm	aN pH	n/a	lactate cap	8	9	9	7.24									2.2			6296.96
291	P21.0	P21.1	P21.1	aN pH	BE UA	lactate cap	3	7	7	7.09		-8.1							2			13144.2
292	P21.1	P21.9	P21.9	aN pH	BE UA	n/a	5	6	9	7.18		-9	-7	-7	-8	-1						5176.12
293	P21.0	P21.0	P21.0	aN pH	BE Std ven	Lactate ven	0	1	3	6.97			-10		-8			-20.3			15	53425.1
294	P20.1	P21.9	Norm	aN pH	n/a	n/a	9	9	10	7.23												1702.27
295	P20.1	P21.9	Norm	aN pH	BE UA	n/a	6	8	9	7.15		-5.9										12156.2
296	P20.1	P21.9	Norm	aN pH	BE UA	n/a	5	9	10	7.19		-5	-3	-3	-3							2355.47
297	P21.0	P21.1	P21.1	pH Kind/vNpH	BE Std ven	Lactate ven	2	5	6		6.98		-5		-5			-8.5			4	127205
298	P20.0	P21.1	P21.1	aN pH	BE Std cap	lactate cap	1	7	9	7.08						-2.1			3			49718.7
299	P20.9	P21.1	P21.1	aN pH	BE Std cap	lactate cap	1	5	7	7.13						-6			3.8			13649.8
300	P21.1	P21.9	Norm	aN pH	BE UV	n/a	5	9	10	7.29		2	1	4	2							8652.69
301	P20.9	P21.9	Norm	aN pH	BE UA	n/a	7	8	9	7.3		3		4								17314.5
302	P20.1	P21.9	P20	aN pH	BE Std UV	n/a	3	8	10	7.11		-9	-9	-6	-9							3304.45
303	P20.9	P21.1	P21.1	pH Kind/vNpH	BE Std ven	Lactate ven	3	6	7	7.04	7.04	-13	-13	-9	-9			-13.2			9.3	74139.2
304	P21.0	P21.9	P21.9	aN pH	BE Std ven	Lactate ven	6	7	8	7.35		0		1				-2.1			3.8	227567
305	P20.1	P21.9	P20	aN pH	BE UA	n/a	7	9	9	7.09		-10	-8	-7	-7							2354.19
306	P20.1	P21.1	P21.1	pH Kind/vNpH	BE Std cap	lactate cap	1	4	5		7.07	-3		-1		-5.6	-4.6		6.1	5.5		164891
307	P20.1	P21.9	Norm	aN pH	BE Std UV	n/a	9	10	10	7.26		-4	-4	-3	-4							2942.66
308	P21.1	P21.1	P21.1	pH Kind/vNpH	BE Std ven	Lactate ven	7	7	9		7.134							-5.4			8	50031.2
309	P21.0	P21.0	P21.0	pH Kind/vNpH	BE UA	lactate cap	2	4	7		6.92	-12							8.3			61496.9
310	P20.1	P21.9	Norm	aN pH	BE UA	lactate cap	9	9	10	7.31		-2	-1	0	-1				2.2			4049.96
311	P21.0	P21.9	Norm	aN pH	BE UA	n/a	7	8	9	7.15		-11	-10	-9	-9							25879.8
312	P20.1	P21.0	P21.0	aN pH	BE UV	Lactate ven	2	5	8	6.96		-16	-16	-11	-11			-12.9			11.7	7440.27
313	P20.1	P21.1	P21.1	pH Kind/vNpH	BE UA	Lactate ven	6	7	9		7.04	-5	-3	-1	-1			-4.4			4.7	4422.69
314	P20.1	P21.9	Norm	aN pH	BE UA	n/a	7	9	10	7.21		-7	-4	-5	-3							69415.3
315	P20.1	P21.9	Norm	aN pH	BE Std cap	lactate cap	7	8	9	7.21						-2.5			1.9			10882.6
316	P21.1	P21.1	P21.1	pH Kind/vNpH	BE Std ven	Lactate ven	2	7	7		7.14	-3	-3	-2	-2			-6.4			4.6	92168.9
317	P20.1	P21.9	Norm	aN pH	BE Std UA	n/a	10	10	10	7.34		-1		-1								14366.2
318	P21.1	P21.9	Norm	aN pH	BE Std ven	Lactate ven	7	8	9	7.32		0	0	1	1			-4.8			4.7	12064.7
319	P20.1	P21.9	Norm	aN pH	n/a	n/a	7	8	9	7.21												6833.49
320	P20.1	P21.9	P20	aN pH	BE Std UV	n/a	8	10	10	7.1		-10	-12	-7	-12							3613.83
321	P20.1	P21.9	Norm	aN pH	BE UA	n/a	9	9	10	7.27		-2	-1	-1	-1							2719.65
322	P20.1	P21.9	Norm	aN pH	BE Std UV	n/a	8	9	10	7.31			-1		-1							1690.69
323	P20.1	P21.9	Norm	pH Kind/vNpH	BE Std UV	n/a	9	10	10		7.35		1		1							2664.15
324	P20.1	P21.9	Norm	pH Kind/vNpH	BE Std ven	Lactate ven	6	8	9		7.15	-1	-1	1	-1			-1.7			2.8	40986
325	P20.1	P21.1	P21.1	aN pH	BE UA	lactate cap	5	7	8	7.14		-6	-2	-3	-2				2.4			2339.84
326	P20.1	P21.9	Norm	pH Kind/vNpH	BE Std UV	n/a	9	10	10		7.43		-4		-5							1628.58
327	P20.1	P21.9	P20	aN pH	n/a	lactate cap	6	8	8	6.84									2.4			13405.6
328	P21.0	P21.9	P21.9	aN pH	BE UV	lactate cap	3	7	9	7.27		-3	-4	-1	-3	-1.5			1.3			15975.3
329	P21.0	P21.1	P21.1	aN pH	BE UA	Lactate ven	2	7	7	7.05		-13	-9	-9	-7			-8			17	45961.3
330	P21.0	P21.9	P21.1	aN pH	BE UA	Lactate ven	1	3	4	7.01		-14	-10	-9	-8			-13.1			17	87185
331	P20.0	P21.0	P21.0	aN pH	BE Std cap	Lactate ven	1	6	5	6.7						-20			12		17	65515.9
332	P20.1	P21.9	P21.9	aN pH	BE UA	n/a	5	7	8	7.22		-7	-6	-6	-6							7888.97
333	P20.1	P21.9	Norm	aN pH	BE Std UV	n/a	8	9	10	7.18			-5		-5							2513.42
334	P20.1	P21.9	P20	aN pH	BE Std cap	lactate cap	8	9	9	7.02						-8.9			6.7			2735.26
335	P20.9	P21.9	Norm	aN pH	BE UA	n/a	7	8	10	7.2		-6	-5	-4	-5							3011.64
336	P21.0	P21.0	P21.0	pH Kind/vNpH	BE Std ven	Lactate ven	1	1	2		6.77	-10	-3	-6	-2			-17.5			15	36560.2
337	P20.9	P21.9	Norm	aN pH	BE UA	n/a	7	8	8	7.18		-5	-3	-2	-1							2577.6
338	P21.0	P21.1	P21.1	aN pH	BE Std cap	lactate cap	2	6	8	7.1						-11			4.9			9720.4
339	P20.1	P21.0	P21.0	pH Kind/vNpH	BE Std ven	Lactate ven	1	5	7		6.93							-16.2			14.9	26607.2
340	P21.9	P21.0	P21.0	pH Kind/vNpH	BE Std cap	lactate cap	2	3	7		6.75					-22.2			15			56133.1
341	P20.0	P21.9	Norm	pH Kind/vNpH	BE Std UV	Lactate ven	8	9	9		7.33	-2.2	-2.6	-2.3	-2.8						2.3	73382.2
342	P20.1	P21.9	Norm	aN pH	BE UA	n/a	8	9	10	7.18		-6	-4	-3	-4							1987.25
343	P21.0	P21.0	P21.0	pH Kind/vNpH	n/a	lactate cap	1	3	6		7								12.1			21869.4
344	P20.1	P21.9	Norm	aN pH	BE Std cap	lactate cap	8	9	10	7.32						0.3			2.5			12659
345	P20.1	P21.0	P21.0	aN pH	BE Std ven	Lactate ven	0	4	6	6.78								-16.3			13	26101.4
346	P20.1	P21.9	P21.9	aN pH	BE Std ven	Lactate ven	3	6	7	7.28			-2		-2			-7.8			5	5063.96
347	P20.1	P21.9	P21.9	aN pH	BE UA	n/a	3	6	7	7.22		-7	-5	-6	-5							16948.4
348	P20.1	P21.9	P21.1	aN pH	BE UA	n/a	2	2	3	6.96		-12										31712.3
349	P20.1	P21.9	P20	aN pH	BE Std cap	lactate cap	9	9	10	7.13						-2			3.3			12110.7
350	P21.0	P21.9	P21.9	aN pH	n/a	n/a	3	7	9	7.15												2839.28
351	P20.1	P21.0	P21.0	pH Kind/vNpH	BE Std ven	Lactate ven	4	6	8		6.97							-17.9			16.8	12953.4
352	P21.0	P21.9	Norm	aN pH	BE UA	n/a	8	8	8	7.26		-1		1								3538.3
353	P21.1	P21.9	Norm	pH Kind/vNpH	BE Std ven	Lactate ven	7	8	9		7.45							-2.9			2.2	20486.3
354	P21.1	P21.9	P21.9	aN pH	BE UA	n/a	7	7	8	7.26		-6	-3	-5	-4							68020.3
355	P21.1	P21.9	P20	aN pH	BE Std cap	lactate cap	4	8	9	7.12						-1.3			4.5			2079.6
356	P20.1	P21.9	Norm	pH Kind/vNpH	BE UV	lactate cap	5	8	8		7.27	1	1	2	2				2.5			133198
357	P21.1	P21.9	Norm	aN pH	BE Std ven	Lactate ven	6	8	9	7.29		-3	-3	-1	-2			-5			4.6	46165
358	P20.1	P21.9	Norm	aN pH	n/a	n/a	8	9	9	7.21												1654.69
359	P20.1	P21.9	P21.9	aN pH	BE UA	lactate cap	6	7	8	7.22		-4	-3	-2	-3				2.1			5308.8
360	P21.1	P21.9	Norm	aN pH	BE UV	lactate cap	7	8	9	7.26		-2	-2	-1	-1	-0.2			3.3			17644.9
361	P21.1	P21.9	Norm	aN pH	BE UA	n/a	6	8	9	7.3		-1	0	1	0							2386.27
362	P21.1	P21.9	P20	aN pH	BE Std ven	Lactate ven	7	8	9	7.12								-5.2			5	16430
363	P21.0	P21.0	P21.0	pH Kind/vNpH	BE Std cap	Lactate art	0	0	0		6.89					-20	-13.8			8.1		53584.2
364	P21.1	P21.9	Norm	aN pH	BE UV	n/a	5	8	9	7.28		0	-1	1	0							1891.01
365	P21.0	P21.1	P21.1	pH Kind/vNpH	BE Std cap	lactate cap	3	5	7		7.04	-10	-10	-9	-9	-13.6			11.4			3833.56
366	P20.1	P21.1	P21.1	aN pH	BE Std cap	lactate cap	6	7	7	7.06						-5.1			3.5			15700.4
367	P21.0	P21.0	P21.0	aN pH	BE Std cap	lactate cap	0	1	4	6.8						-21.1			18			114169
368	P20.1	P21.9	Norm	aN pH	n/a	n/a	8	9	9	7.22												2586.1
369	P20.1	P21.9	Norm	aN pH	BE UA	n/a	8	9	10	7.21		-4	-2	-1	-1							1967.28
370	P20.1	P21.9	P20	aN pH	n/a	lactate cap	7	8	8	7.03									18			13539.3
371	P20.1	P21.9	Norm	pH Kind/vNpH	n/a	n/a	8	9	9		7.32											2313.54
372	P20.1	P21.9	Norm	aN pH	n/a	n/a	8	9	10	7.28												1875.36
373	P20.1	P21.9	P21.9	aN pH	BE UA	n/a	1	4	6	7.15		-12					-4.2					20953.4
374	P20.1	P21.9	Norm	aN pH	BE UA	lactate cap	9	10	10	7.18		-8.2				-2.3			2.2			18396.4
375	P20.1	P21.9	Norm	aN pH	BE Std ven	Lactate ven	7	8	8	7.16						-4.7		-4.7			6	28877.8
376	P20.1	P21.9	Norm	aN pH	n/a	n/a	9	9	10	7.21												3857.68
377	P20.1	P21.9	Norm	aN pH	n/a	n/a	9	10	10	7.15												2178.46
378	P20.1	P21.1	P21.1	aN pH	n/a	lactate cap	5	7	9	7.05									6			18329.3
379	P20.1	P21.9	Norm	pH Kind/vNpH	BE Std UV	n/a	8	9	9		7.322		-4.9		-5.2							2020.83
380	P21.0	P21.0	P21.0	pH Kind/vNpH	BE Std cap	lactate cap	1	3	5		6.89					-22			11.3			28508.2
381	P20.1	P21.9	Norm	aN pH	n/a	n/a	6	8	9	7.24												2121.32
382	P20.1	P21.9	Norm	aN pH	n/a	n/a	8	10	10	7.31												3364.58
383	P21.0	P21.0	P21.0	pH Kind/vNpH	BE Std cap	Lactate ven	2	2	3		6.89					-15.3					5.9	46167.2
384	P21.0	P21.9	P21.9	aN pH	n/a	n/a	2	7	9	7.29												65529.6
385	P21.1	P21.9	P21.9	aN pH	BE Std ven	Lactate ven	6	7	8	7.29			-2		-2			-4.2			3.3	19343.1
386	P20.1	P21.9	P20	aN pH	BE Std cap	lactate cap	7	8	8	7.08						-7.4			8.7			38342.5
387	P20.1	P21.9	P20	aN pH	n/a	n/a	8	8	9	7.12												4614.3
388	P21.0	P21.9	P21.9	aN pH	BE Std ven	Lactate ven	4	6	8	7.34								-6.3			5.6	57810.5
389	P20.9	P21.1	P21.1	pH Kind/vNpH	BE Std cap	lactate cap	4	7	7		7.06					-8.5			7.6			9840.11
390	P20.1	P21.0	P21.0	aN pH	BE Std cap	lactate cap	1	4	7	7.01						-19			15			29452.3
391	P20.1	P21.9	P21.9	aN pH	BE UV	Lactate art	2	4	8	7.25		-2	-2	0	-1					2		10083.6
392	P20.0	P21.9	Norm	aN pH	BE UA	n/a	9	10	10	7.2		-5	-4	-3	-4							2222.91
393	P20.1	P21.1	P21.1	pH Kind/vNpH	BE Std ven	Lactate ven	6	7	8		7.01	-8	-9	-5	-6			-11			11	16259.8
394	P21.0	P21.0	P21.0	pH Kind/vNpH	BE Std ven	Lactate ven	2	3	6		6.98							-16.1			17	82108.5
395	P21.0	P21.1	P21.1	pH Kind/vNpH	BE Std cap	lactate cap	2	4	5		7					-11.7			7.2			204632
396	P21.0	P21.1	P21.1	pH Kind/vNpH	BE UV	Lactate ven	3	6	7		7.13		-6		-4						6	132649
397	P20.1	P21.9	P21.9	pH Kind/vNpH	n/a	n/a	5	2	7		7.3											18384.9
398	P20.1	P21.0	P21.0	pH Kind/vNpH	BE Std cap	n/a	4	6	8		6.9					-20						71763.7
399	P20.1	P21.1	P21.1	aN pH	BE Std cap	lactate cap	3	5	9	7.07						-3.7			5.4			1372.61
400	P21.0	P21.0	P21.0	pH Kind/vNpH	BE Std cap	lactate cap	3	3	4		6.9					-12.2			16			41254.7
401	P20.1	P21.9	Norm	aN pH	BE Std UV	n/a	8	9	9	7.342		-1.4	-2.6	-1.2	-3.1							2956.87
402	P20.1	P21.9	Norm	aN pH	n/a	n/a	6	8	9	7.27												3644.29
403	P20.1	P21.0	P21.0	pH Kind/vNpH	BE Std ven	Lactate ven	1	3	3		6.9		-6		-6.7			-15.5			15	117727
404	P21.0	P21.9	P21.1	pH Kind/vNpH	BE Std cap	lactate cap	5	10	10		6.96					-14.1			11.4			29075.5
405	P20.1	P21.0	P21.0	aN pH	BE UA	lactate cap	1	2	2	6.91		-14							15			31415.2
406	P20.1	P21.9	P21.9	aN pH	BE Std UV	n/a	6	7	8	7.165		-5.1	-5.1	-4.5	-5.4							2214.57
407	P20.1	P21.1	P21.1	aN pH	BE UV	Lactate art	3	7	8	7.062		-8.7	-8.7	-7.7	-7.9					4.1		6608.01
408	P20.1	P21.0	P21.0	pH Kind/vNpH	BE Std ven	Lactate ven	0	1	2		6.79	-2		-1.7	-3.2			-16.5			13.6	75123.9
409	P20.0	P21.9	Norm	aN pH	BE Std ven	Lactate ven	8	9	9	7.29							-1.6	-4.3		3.7	4.9	152439
410	P21.0	P21.0	P21.0	pH Kind/vNpH	BE Std cap	lactate cap	0	0	0		6.89					-11			24			125423
411	P20.1	P21.9	P21.9	aN pH	n/a	n/a	5	7	7	7.34												110407
412	P20.9	P21.1	P21.1	pH Kind/vNpH	BE Std ven	Lactate ven	4	7	7		6.98	-8.2	-7.9	-7.9	-7.7			-11.3			11.1	24808
413	P20.1	P21.1	P21.1	pH Kind/vNpH	BE Std cap	lactate cap	3	4	7		7.01		-7.5		-7.8	-12			10.6			7658.64
414	P20.0	P21.9	Norm	aN pH	BE Std UA	n/a	6	8	10	7.249		-5.9		-6								2132.56
415	P20.1	P21.9	Norm	aN pH	n/a	n/a	9	9	10	7.33												27353.4
416	P21.0	P21.0	P21.0	pH Kind/vNpH	BE Std ven	Lactate ven	1	5	6		7.09		-5.3		-5.1			-15.6			19	131126
417	P20.1	P21.0	P21.0	aN pH	BE UA	lactate cap	2	3	3	6.99		-15					-11		14.7	9.4		74403.4
418	P20.9	P21.9	P20	aN pH	BE Std cap	lactate cap	8	9	10	7.13						-3			3.6			14274.5
419	P20.1	P21.9	P20	pH Kind/vNpH	BE Std UV	lactate cap	6	8	9		7.143		-12.7		-13.5				7.7			8276.75
420	P21.0	P21.0	P21.0	pH Kind/vNpH	BE Std cap	n/a	0	1	3		6.93					-14.9						20532.2
421	P21.0	P21.0	P21.0	pH Kind/vNpH	BE Std cap	lactate cap	4	2			6.9					-16			13.2			41063
422	P21.0	P21.1	P21.1	aN pH	n/a	n/a	3	7	9	7.14												8753.51
423	P20.1	P21.9	P21.9	aN pH	BE Std cap	lactate cap	4	7	7	7.18						-11.5			10.1			482373
424	P20.1	P21.9	P20	aN pH	n/a	n/a	8	9	10	7.09												1858.49
425	P20.0	P21.9	Norm	aN pH	BE Std UV	n/a	7	9	9	7.234		-3.6	-4	-3.2	-4							3069.99
426	P20.1	P21.0	P21.0	pH Kind/vNpH	BE Std cap	lactate cap	0	4	8		7.09					-13			13.4			28583.1
427	P21.0	P21.9	P21.9	aN pH	BE UA	lactate cap	0	4	5	7.19		-7.7							5.3			33790.6
428	P20.0	P21.9	P21.1	aN pH	BE Std ven	Lactate ven	1	3	6	7.036		-9.5	-6.5	-9	-6.6	-12.6		-14.3			17	44385.4
429	P20.1	P21.9	Norm	aN pH	BE UA	n/a	8	9	9	7.179		-5	-4.8	-4.8	-4.8							3136.79
430	P21.0	P21.1	P21.1	pH Kind/vNpH	BE Std ven	Lactate ven	1	6	8		7.09	0.1	-0.8	0.2	-1.3			-8.8			7	70292.5
431	P21.0	P21.9	P21.9	aN pH	BE Std art	Lactate art	3	6	8	7.2							2.8			2.4		209818
432	P20.1	P21.1	P21.1	aN pH	BE Std cap	n/a	2	4	7	7.02		-12.1				-12.3						61923.6
433	P20.9	P21.9	not_assoc	pH Kind/vNpH	n/a	n/a					7.21											306218
434	P20.9	P21.9	Norm	n/a	n/a	n/a	5	8	9	7.4												2893.36
435	P20.0	P21.9	Norm	pH Kind/vNpH	BE Std ven	Lactate ven	7	8	9		7.19	-3		-2.7				-7.9			6.1	19996.2
436	P20.1	P21.1	P21.1	aN pH	BE Std ven	Lactate ven	2	7	9	7.027		-7.9	-7.3	-7.2	-6.7			-11.4			9.7	5828.77
437	P20.1	P21.9	P20	aN pH	BE UA	n/a	1	8	8	7.077		-12.1		-11.7								8791.11
438	P20.1	P21.9	Norm	aN pH	n/a	n/a	8	8	8	7.31												19908
439	P20.1	P21.9	Norm	pH Kind/vNpH	n/a	n/a	6	8	9		7.38											3439.95
440	P20.9	P21.9	Norm	aN pH	BE Std UV	n/a	9	8	8	7.351		-0.3	-1.5	-0.1	-1.7							3070.34
441	P20.1	P21.1	P21.1	aN pH	BE Std UA	n/a	7	7	9	7.105		-13.9	-12.7	-14.4	-13.4							1643.79
442	P21.0	P21.1	P21.1	pH Kind/vNpH	BE Std cap	n/a	3	5	4		7.02					-12						32916.1
443	P20.9	P21.1	P21.1	aN pH	n/a	n/a	6	7	7	7.09												6041.51
444	P20.1	P21.9	P20	aN pH	n/a	n/a	8	9	10	7.14												2160.61
445	P20.1	P21.9	P21.9	aN pH	n/a	n/a	6	7	10	7.31												1650.37
446	P21.9	P21.9	P21.9	pH Kind/vNpH	BE Std art	Lactate art	1	6	7		7.28						-5.7			4.7		171589
447	P20.1	P21.9	Norm	aN pH	BE UV	n/a	7	9	10	7.332			0.7	3.3	1							2606.01
448	P20.9	P21.9	P20	aN pH	BE Std UV	n/a	8	9	10	7.138		-5.2	-5.4	-4.2	-6							2213.03
449	P20.1	P21.9	Norm	aN pH	BE Std UV	Lactate art	10	10	10	7.344		0	-1.8	0.2	-1.9					2.3		36182.9
450	P21.0	P21.0	P21.0	pH Kind/vNpH	BE Std art	Lactate art	1	1	2		6.87						-16.1			7.7		317029
451	P20.1	P21.1	P21.1	pH Kind/vNpH	BE Std ven	Lactate ven	5	7	8		7.04							-9.4			7.8	116702
452	P20.1	P21.9	P20	aN pH	n/a	n/a	8	9	9	7.12												1463.63
453	P20.1	P21.9	P20	aN pH	BE Std ven	n/a	1	8	9	7.07		-8.6	-9	-8.9	-9.7			-9.9				19335.5
454	P20.1	P21.9	Norm	aN pH	BE Std UV	n/a	9	10	10	7.279		-5.3	-5.2	-5.4	-6.2							2173.82
455	P20.9	P21.9	Norm	aN pH	BE Std UV	n/a	9	10	10	7.242		-5	-6.7	-5	-7.7							2393.15
456	P20.9	P21.1	P21.1	aN pH	BE UA	Lactate art	6	7	7	7.1		-9					-4.1			6.5		41107.4
457	P20.1	P21.9	P20	aN pH	BE UA	lactate cap	9	10	10	7		-12				0.3			3.3			14842.1
458	P20.1	P21.9	Norm	aN pH	n/a	n/a	4	8	9	7.18												2561.47
459	P21.0	P21.0	P21.0	pH Kind/vNpH	BE Std cap	lactate cap	0	0	0		7.3					-12.5			13.1			102969
460	P20.1	P21.1	P21.1	aN pH	BE Std UV	n/a	4	7	8	7.098		-6.5	-7.1	-6	-7.8							1787.3
461	P20.1	P21.1	P21.1	aN pH	n/a	n/a	1	6	9	7.11												5621.44
462	P21.0	P21.0	P21.0	aN pH	BE UA	lactate cap	1	4	6	6.97		-15				-12.5			9.9			42866.2
463	P21.0	P21.1	P21.1	pH Kind/vNpH	BE Std cap	n/a	3	5	5		6.91					-15.7						130718
464	P20.1	P21.9	P21.1	aN pH	BE UA	lactate cap	1	3	3	6.9		-12.6							4.9			22897.6
465	P21.9	P21.0	P21.1	pH Kind/vNpH	BE Std cap	n/a	7	7	2		6.92					-18.8						18962.4
466	P20.1	P21.9	P20	aN pH	BE Std cap	n/a	8	8	9	7.08						-2.7						21126.3
467	P20.9	P21.9	P20	aN pH	BE Std cap	lactate cap	9	10	10	7.11						-1.3			4.7			13883.4
468	P20.9	P21.9	P20	aN pH	n/a	n/a	9	10	10	7.14												1857.67
469	P20.9	P21.9	P20	aN pH	BE UV	n/a	3	8	9	7.13			-4.5		-4.1							1595.72
470	P21.0	P21.0	P21.0	pH Kind/vNpH	BE Std cap	n/a	2	4	4		7.05					-17.3						90948.3
471	P20.9	P21.9	P21.1	aN pH	BE Std cap	lactate cap	1	6	6	7.19						-0.5			3.7			10931.2
472	P20.1	P21.1	P21.1	aN pH	BE UA	n/a	3	5	8	6.81		-13.8										11610.2
473	P21.0	P21.0	P21.0	pH Kind/vNpH	BE Std cap	lactate cap	1	1	3		6.62					-22.1			15			71184.1
474	P20.0	P21.9	Norm	pH Kind/vNpH	BE Std UV	Lactate ven	7	8	8		7.28	0.7	-0.7	0.9	-0.9						1.4	60944.3
475	P20.1	P21.9	Norm	aN pH	BE Std UV	n/a	8	9	9	7.19			-3.8		-3.8							1680.62
476	P20.1	P21.9	P21.1	aN pH	BE Std UV	Lactate ven	1	3	6	7.037		-15.5	-15.7	-15.8	-16						9.3	18507.2
477	P20.9	P21.9	P20	aN pH	BE UA	Lactate ven	1	8	9	7.09		-13.6								5.6	15	33421.5
478	P21.0	P21.9	P21.9	pH Kind/vNpH	BE Std cap	Lactate ven	1	1	6		7.2					-13.7					5.1	43836.2
479	P20.9	P21.9	Norm	aN pH	BE UA	n/a	9	9	9	7.18		-3.9	-2.6	-3.6	-3.2							1697.59
480	P21.0	P21.0	P21.0	aN pH	BE Std cap	Lactate ven	0	2	2	6.85						-29.9					13.9	99899.1
481	P20.1	P21.9	Norm	aN pH	n/a	Lactate ven	8	9	10	7.15											6.9	11731.6
482	P20.1	P21.1	P21.1	aN pH	BE Std cap	lactate cap	1	6	6	7.06						-11.9			10.9			28494.9
483	P20.1	P21.9	P20	aN pH	BE UA	n/a	7	8	9	7.121		-8.9	-3.8	-8.7	-4.2							2778.27
484	P20.1	P21.9	Norm	pH Kind/vNpH	BE Std ven	Lactate ven	8	9	9		7.19	-10.1		-10.5				-12.5			8.2	21833.7
485	P20.1	P21.9	Norm	aN pH	BE UV	n/a	9	10	10	7.286		1.3	-0.7	2.3	-0.5							2991.92
486	P21.0	P21.0	P21.0	pH Kind/vNpH	BE Std ven	Lactate ven	4	4	3		6.66							-27.4			25	45410.1
487	P20.1	P21.1	P21.1	pH Kind/vNpH	BE UV	Lactate ven	3	7	7		7.02	-3	-3	-2	-2						3.7	4693.19
488	P21.0	P21.9	P21.9	pH Kind/vNpH	BE Std cap	lactate cap	4	7	8		7.32					-3.8			4.2			137010
489	P20.1	P21.9	P20	aN pH	BE UA	n/a	7	9	9	7.126		-5.3	-3.9	-4.5	-4.4							1821.8
490	P20.1	P21.9	P20	aN pH	BE UA	n/a	7	8	9	7.054		-8.4	-7.6	-7.7	-7.7							2731.14
491	P20.1	P21.9	P20	aN pH	BE UA	lactate cap	6	8	9	7.08	7.36	-8.1		-7.5					5.3	2.1		2724.07
492	P21.0	P21.9	Norm	aN pH	BE Std UA	n/a	9	10	10	7.22		-5.4		-5.6								2187.17
493	P20.0	P21.9	Norm	aN pH	BE Std UA	n/a	8	9	10	7.18		-7.5		-7.7								2388.39
494	P20.1	P21.9	not_assoc	pH Kind/vNpH	BE Std cap	lactate cap					7.06					-10.4			7.2			318954
495	P21.0	P21.9	P21.9	pH Kind/vNpH	BE Std ven	Lactate ven	1	2	1	7.25	7.15	-3.1	-3.4	-3	-3.4			-5.9			4.5	48885.8
496	P21.0	P21.9	P20	pH Kind/vNpH	BE Std ven	Lactate ven	5	8	8		7.12							-11			12.5	16244.4
497	P21.9	P21.9	Norm	aN pH	BE Std UV	n/a	8	9	9	7.24		-6.7	-8.1	-6.8	-8.8							4450.26
498	P20.1	P21.9	P20	pH Kind/vNpH	BE Std ven	Lactate ven	4	8	9	7.35	7.07	-0.6	-0.3	-0.6	-0.4			-7.4			3.2	64557.7
499	P21.0	P21.9	P21.9	aN pH	n/a	n/a	1	2	4	7.36												14011.1
500	P20.9	P21.9	Norm	aN pH	n/a	n/a	8	10	10	7.26												12969.6
501	P20.9	P21.1	P21.1	aN pH	n/a	n/a	5	7	10	7.01												3303.39
502	P21.0	P21.0	P21.0	aN pH	BE UA	lactate cap	4	5	7	6.97		-19							17			13532
503	P21.1	P21.0	P21.0	aN pH	BE UA	n/a	2	5	6	6.92		-17.7	-16.5	-17.6	-16.9							15534.6
504	P20.9	P21.1	P21.1	aN pH	BE Std UA	n/a	7	7	8	7.12		-9.5		-9.5								4164.19
505	P21.1	P21.9	P21.9	aN pH	BE UA	n/a	6	7	7	7.16		-5.1	-2.9	-4.7	-3.2							4406.42
506	P20.1	P21.9	Norm	aN pH	BE Std UA	n/a	7	8	9	7.24		-9.3		-9.9								2763.14
507	P20.1	P21.9	Norm	n/a	BE Std UV	n/a	7	8	9		7.26		-7		-7.6							2784.07
508	P21.0	P21.1	P21.1	aN pH	BE Std cap	n/a	2	5	5	7.12	7.14					-11.7						44694
509	P20.9	P21.1	P21.1	aN pH	BE Std ven	Lactate ven	2	7	9	7.05	7.07	-10.3		-10.2				-14.5			8.9	14788
510	P21.0	P21.9	P21.1	pH Kind/vNpH	BE Std art	Lactate art	3	2	3	7.36	6.99	-1.4	-2.4	-1.4	-2.7		-11.2			5.5		291812
511	P21.0	P21.1	P21.1	aN pH	BE UA	lactate cap	1	6	7	7.01	7.14	-5.4				-4.6			5.7			5389.12
512	P20.1	P21.9	P21.1	aN pH	n/a	n/a	2	2	3	6.98												7843.99
513	P20.9	P21.9	P20	aN pH	BE Std UV	n/a	7	8	9	7.015		-12.5	-12.5	-12.3	-13.5							11065.9
514	P20.9	P21.9	P20	aN pH	n/a	n/a	8	10	10	7.02												30477
515	P20.1	P21.9	Norm	aN pH	BE Std UV	n/a	8	9	9	7.196		-4.5	-4.2	-4.2	-4.7							3104.64
516	P20.9	P21.1	P21.1	pH Kind/vNpH	BE Std ven	Lactate ven	3	5	7	7.37	7.07	-1.8	-1.3	-1.9	-1.6			-9.1			5.6	144464
517	P20.1	P21.9	Norm	aN pH	n/a	n/a	8	9	10	7.16												2650.52
518	P20.1	P21.1	P21.1	aN pH	BE UA	lactate cap	1	6	9	7.117	7.2	-9.2				-7.5		-8	6.2		5.8	3500.76
519	P20.9	P21.0	P21.0	pH Kind/vNpH	BE Std ven	Lactate ven	3	6	7	7.011	6.93	-13.1	-12.9	-13.5	-13.5	-11.3		-18	7.7		13.5	36573.4
520	P20.9	P21.9	Norm	aN pH	BE Std UV	n/a	9	9	10	7.324		0.7	-0.5	1.2	-0.8							2813.33
521	P20.1	P21.9	P20	aN pH	BE UA	n/a	4	8	8	7.091		-11.3		-11.1								2276.08
522	P20.1	P21.9	Norm	aN pH	BE Std UV	n/a	9	9	10	7.26			-4.7		-5.1							3664.69
523	P20.1	P21.1	P21.1	aN pH	BE UA	lactate cap	3	6	8	7.067	7.33	-7.2	-5.6	-6.4	-5.3	-4.3			7.5			3901.49
524	P20.9	P21.1	P21.1	pH Kind/vNpH	BE Std ven	Lactate ven	4	6	7	7.22	7.13	-1.9	-2.5	-1.6	-2.8			-7			7.8	36538.4
525	P20.1	P21.9	P20	aN pH	BE Std cap	lactate cap	8	9	10	7.096	7.32	-9.9	-9.4	-10	-10.2	-10.3			8.3			2590.05
526	P20.1	P21.1	P21.1	aN pH	BE UA	n/a	4	5	9	7.07		-7.4		-6.6								2450.37
527	P21.0	P21.1	P21.1	aN pH	BE UA	lactate cap	2	6	7	7.04	7.24	-9				-5			7.1			16021.1
528	P20.1	P21.9	P20	aN pH	BE UA	n/a	4	9	10	7.083		-6.9	-6.6	-6	-6.3							3196.72
529	P20.9	P21.9	P21.9	aN pH	BE Std ven	Lactate ven	2	7	9	7.17	7.27	-4.8		-4.4				-6.8			4.1	4696.45
530	P20.9	P21.0	P21.0	aN pH	BE UA	Lactate ven	4	5	6	6.94		-10									16.8	17073.9
531	P20.1	P21.0	P21.0	aN pH	BE UA	lactate cap	1	4	4	6.5		-24							16			41320.4
532	P20.9	P21.9	P21.9	pH Kind/vNpH	BE Std cap	lactate cap	4	5	6	7.32	7.31	-0.9	-1.6	-0.7	-1.6	-4.8			8.5			52881.7
533	P20.1	P21.9	Norm	n/a	BE Std UV	n/a	7	8	9		7.34		-3.7		-4							2019.16
534	P20.1	P21.9	Norm	aN pH	BE UA	n/a	7	8	10	7.17		-5.3	-4.6	-4.8	-4.9							3748.55
535	P20.1	P21.1	P21.1	aN pH	n/a	n/a	4	6	7	7.01												5876.83
536	P20.9	P21.9	Norm	aN pH	BE Std UV	n/a	8	9	9	7.3		1		1.5	-1.6							1979.86
537	P20.1	P21.9	Norm	aN pH	BE Std UV	n/a	1	9	10	7.28		-0.2	-0.5	0.8	-0.6							2478.67
538	P20.1	P21.9	P20	aN pH	BE Std UA	n/a	7	8	9	7.14		-8.2	-6.3	-8.5	-6.7							6795.45
539	P20.1	P21.9	Norm	aN pH	BE UA	n/a	8	9	10	7.23		-2.5	-2.2	-1.8	-2							3914.64
540	P20.1	P21.1	P21.1	pH Kind/vNpH	BE Std ven	Lactate ven	5	6	6	7.31	6.97							-10.1			7.4	4640.62
541	P20.9	P21.9	P21.9	aN pH	n/a	n/a	3	4	10	7.2												32440.9
542	P20.1	P21.1	P21.1	aN pH	BE UA	n/a	4	6	8	7.04	7.16	-12										4042.96
543	P21.0	P21.0	P21.0	pH Kind/vNpH	BE Std cap	n/a	1	4	4	7.04	6.96					-18						28442.8
544	P20.1	P21.9	Norm	aN pH	BE Std UV	n/a	6	9	9	7.16		-7.7	-7.5	-7.5	-7.7							3379.88
545	P21.0	P21.0	P21.0	pH Kind/vNpH	n/a	n/a	1	2	4		6.89											53312.1
546	P21.0	P21.0	P21.0	pH Kind/vNpH	n/a	Lactate art	3	2	2	6.97	6.83									9.3		45706.5
547	P20.9	P21.1	P21.1	aN pH	BE UA	n/a	4	5	8	7.06		-14.6										8085.36
548	P20.1	P21.9	P20	aN pH	BE Std UV	n/a	8	9	10	7.13	7.26	-6.2	-7.5	-5.4	-7.9	2.3						2338.61
549	P20.9	P21.1	P21.1	pH Kind/vNpH	BE Std ven	Lactate ven	3	6	7	7.11	7	-11.2	-11.9	-11.1	-12.7			-14.7			7.4	6188.22
550	P21.0	P21.1	P21.1	pH Kind/vNpH	BE Std ven	Lactate ven	2	4	7	7.11	6.9	-6						-13			8	15179.8
551	P20.1	P21.0	P21.0	pH Kind/vNpH	n/a	n/a	0	1	7	7.1	6.9											54906.6
552	P20.1	P21.9	Norm	aN pH	BE UA	n/a	9	9	9	7.17		-5.7	-4.8	-4.9	-4.7							3347.28
553	P20.1	P21.1	P21.1	aN pH	BE UV	lactate cap	6	7	8	7.1	7.33		-8.7		-8.5	-0.5			2.9			5238.13
554	P20.1	P21.9	Norm	aN pH	BE Std UV	n/a	4	9	10	7.25		-4.4	-4.9	-4.2	-5.2							1607.5
555	P20.1	P21.9	Norm	aN pH	BE Std UV	n/a	9	9	9	7.27		-1.8	-4.5	-1.3	-4.6							3418.68
556	P20.1	P21.9	P20	aN pH	n/a	n/a	8	9	10	7.1												1856.23
557	P21.0	P21.0	P21.0	aN pH	BE Std UV	Lactate ven	0	0	0	6.97		-11		-14.5	-25						17	2168.17
558	P20.1	P21.9	P20	aN pH	BE UA	n/a	7	8	9	7.04		-10.6	-6.3	-10.4	-6.5							3810.18
559	P20.1	P21.9	Norm	aN pH	BE UV	n/a	8	9	10	7.27		-0.7	-1.6	0	-1.5							3293.08
560	P20.9	P21.1	P21.1	pH Kind/vNpH	n/a	n/a	3	7	9	7.13	7.08											31919.4
561	P20.1	P21.9	Norm	aN pH	BE UA	n/a	8	9	10	7.18		-3.2		-2.8								2109.79
562	P21.0	P21.9	P21.9	aN pH	BE Std art	lactate cap	1	3	6	7.19	7.43						-8.1		8.1	5.8		31970.1
563	P20.1	P21.9	P20	aN pH	BE Std UA	lactate cap	4	9	10	7.14	7.23			-6.2		-5.9			5.9			2107.62
564	P20.9	P21.1	P21.1	aN pH	BE UA	lactate cap	1	4	4	7.07	7.27	-8.8	-8.3	-8.1	-8	-8.6			12.9			33885.7
565	P20.9	P21.9	P20	aN pH	BE UA	lactate cap	7	9	10	7.13	7.29	-7.4	-5.9	-6.9	-5.7	-7			9.5			7016.13
566	P21.0	P21.1	P21.1	pH Kind/vNpH	n/a	n/a	3	5	5	7.07	6.8											146202
567	P21.1	P21.1	P21.1	aN pH	BE UA	Lactate ven	6	7	8	6.91		-12.6				-3.6					9.8	50433
568	P20.9	P21.9	P20	aN pH	BE Std UV	n/a	8	9	9	7.08		-11	-11.9	-10.5	-12.6							2685.89
569	P20.1	P21.9	P20	aN pH	BE UV	lactate cap	7	9	10	7.11	7.22	-7	-7.4	-6.5	-7.3	-6.5			7.5			3809.16
570	P20.9	P21.1	P21.1	pH Kind/vNpH	BE Std ven	Lactate ven	5	6	6	7.1	7.06	-10.7	-10.9	-11.1	-11.8			-13.9			13.1	55797.1
571	P21.0	P21.0	P21.0	pH Kind/vNpH	BE Std ven	n/a	1	4	4	7.15	6.99	-7.2	-6.7	-6.8	-6.4			-11.2				51445.2
572	P20.9	P21.1	P21.1	pH Kind/vNpH	BE Std cap	n/a	3	6	5	7	6.99					-9.3						28002.2
573	P21.0	P21.0	P21.0	n/a	BE UV	Lactate ven	1	6	7				-17								14	26611.6
574	P20.0	P21.9	P21.9	pH Kind/vNpH	BE Std ven	Lactate ven	3	6	8	7.36	7.15	3	1	3.4	1			-2.1			1.9	128066
575	P20.1	P21.1	P21.1	pH Kind/vNpH	BE Std ven	Lactate ven	2	7	9	7.13	7.04	-6.3	-5.3	-6	-5			-10			10.7	9950.1
576	P20.9	P21.9	P20	aN pH	BE UV	n/a	9	10	10	7.13		-4.9	-5	-4.3	-4.7							3890.56
577	P20.1	P21.9	P20	aN pH	BE UA	n/a	8	9	9	7.04		-11.4	-9.3	-10.6	-9							1714.66
578	P20.9	P21.9	Norm	aN pH	BE UA	n/a	6	8	10	7.29		-1.4	-0.4	-1	-0.2							2512.04
579	P20.9	P21.9	P20	aN pH	BE UA	n/a	8	9	10	7.14		-5.5	-4.6	-5	-4.9							2229.3
580	P20.1	P21.1	P21.1	pH Kind/vNpH	BE Std ven	Lactate ven	4	6	8	7.07	7	-7.9	-6.5	-6.9	-6.2			-11.6			8.4	6653.75
581	P20.1	P21.9	P20	aN pH	BE UA	n/a	8	10	10	7.04		-11.8	-8.1	-11.5	-8.8							2869.71
582	P20.0	P21.1	P21.1	pH Kind/vNpH	BE Std ven	Lactate ven	3	6	6	7.33	7.12	0.6	-0.8	1	-0.8			-5.4			4.4	56060.3
583	P21.0	P21.0	P21.0	aN pH	BE Std UA	Lactate ven	0	5	7	6.91	6.92	-17.1	-16.9	-17.1	-17			-16.2			13.2	40812.5
584	P20.9	P21.1	P21.1	pH Kind/vNpH	BE Std cap	n/a	2	5	6	7.24	7.03					-8.3						9854.37
585	P20.1	P21.9	Norm	aN pH	BE UA	n/a	8	9	10	7.16		-7.1	-5.3	-6.8	-5.5							1716.89
586	P21.0	P21.9	P21.1	pH Kind/vNpH	BE UV	lactate cap	0	1	1		7.28		-10			-9.8			12			14080.8
587	P21.1	P21.9	Norm	aN pH	BE UA	n/a	5	8	9	7.36		3.1	3.5	3.8	4.2							29615.9
588	P21.0	P21.0	P21.0	pH Kind/vNpH	n/a	lactate cap	0	2	2	7.11	6.52								23	21		22192.9
589	P20.1	P21.9	P20	aN pH	n/a	n/a	4	8	10	7.04												9825.6
590	P21.0	P21.9	P21.9	pH Kind/vNpH	BE Std UV	Lactate ven	3	5	6		7.2				-7.4						8.9	13552.6
591	P21.0	P21.9	P21.1	pH Kind/vNpH	BE Std UV	n/a	3	2	3	7.43	6.85	4	1.7	4.5	1.3							4980.94
592	P20.0	P21.1	P21.1	pH Kind/vNpH	BE Std cap	n/a	2	5	6	7.31	7.07	1.3	0.7	2.3	1.4	-8.5						51055.9
593	P21.0	P21.9	P21.1	n/a	n/a	n/a	0	7	9													25946.8
594	P21.1	P21.9	Norm	pH Kind/vNpH	BE Std ven	Lactate ven	6	10	10	7.41	7.31	2		2.3				-0.3			2.2	24425.5
595	P20.9	P21.9	Norm	aN pH	n/a	n/a	8	9	10	7.23												2861.53
596	P21.0	P21.0	P21.0	pH Kind/vNpH	BE Std art	Lactate ven	1	2	3		6.81						-16.5	-16.3		15	16	6732.55
597	P20.1	P21.9	not_assoc	n/a	n/a	n/a	9	9	9													27834.2
598	P20.9	P21.9	P20	aN pH	BE UA	n/a	7	8	8	7.09		-6	-3.7	-5.3	-3							2579.16
599	P21.1	P21.1	P21.1	aN pH	BE UA	n/a	4	7	8	6.96		-12										29366.4
600	P20.1	P21.9	Norm	aN pH	BE UA	n/a	8	9	10	7.25		-3.2		-3								2393
601	P20.9	P21.9	Norm	pH Kind/vNpH	BE Std UA	Lactate art	9	9	10		7.27			-7.1	-5.5					4.4	4.2	2645.67
602	P21.1	P21.9	P21.9	aN pH	BE UA	n/a	6	7	8	7.25		-2.1	1.7	-1.9	2.1							5597.21
603	P21.0	P21.1	P21.1	aN pH	n/a	Lactate art	1	7	8	6.76										6.8		27587.4
604	P20.1	P21.9	P20	aN pH	n/a	n/a	8	9	9	7.06												10206.2
605	P21.9	P21.1	P21.1	aN pH	BE UA	n/a	5	7	9	6.94		-12.4		-11.9								3071.63
606	P20.1	P21.1	P21.1	aN pH	n/a	n/a	7	7	7	6.94												13469
607	P21.0	P21.0	P21.0	pH Kind/vNpH	BE Std ven	Lactate ven	8	2	2	7.25	6.78	-6.8	-6.3	-8	-6.8			-24.9			17	6777.75
608	P20.0	P21.9	P21.1	pH Kind/vNpH	BE Std ven	Lactate ven	2	1	1	7.35	6.86	1.4		2				-12.5			10.2	3299.72
609	P20.1	P21.9	P20	aN pH	BE UA	lactate cap	8	8	9	7.13	7.25	-7.1		-6.9		-3.4			5.1			3177.43
610	P20.1	P21.9	P21.1	pH Kind/vNpH	BE Std cap	lactate cap	1	2	2	7.37	7.02					-22.5			11.5			8963.56
611	P21.0	P21.9	P21.9	aN pH	n/a	n/a	3	5	7	7.31												17588.6
612	P20.0	P21.0	P21.0	pH Kind/vNpH	n/a	Lactate ven	0	3	7		6.92										19	8150.59
613	P20.1	P21.9	P20	pH Kind/vNpH	n/a	lactate cap	8	9	9	7.32	7.13								3.5			3262.2
614	P21.0	P21.0	P21.0	pH Kind/vNpH	BE UA	Lactate ven	0	1	1	6.67	6.55	-29				-24.1	-25.6	-24.9	19	21	21	10810.1
615	P21.0	P21.9	P21.9	aN pH	BE Std UV	n/a	1	1	0	7.32		-2	-2	-1	-3							2896.86
616	P21.9	P21.0	P21.0	pH Kind/vNpH	BE Std cap	n/a	3	0	0	7.32	6.91					-18						17894.8
617	P20.1	P21.1	P21.1	aN pH	BE UA	lactate cap	3	6	8	7.13	7.29	-6	-3.7	-5.6	-4.1	-2.2			3.7			7828.79
618	P21.0	P21.0	P21.0	pH Kind/vNpH	BE Std cap	lactate cap	3	4	3		6.68					-21.5			20			63902.8
619	P21.0	P21.9	P21.1	aN pH	BE UA	n/a	1	3	4	7.29		-9.7										28166.2
620	P20.1	P21.9	P21.9	aN pH	n/a	n/a	0	3	8	7.21												26550.7
621	P20.1	P21.1	P21.1	aN pH	n/a	lactate cap	4	6	7	6.98									12			26020.5
622	P21.0	P21.9	not_assoc	n/a	n/a	n/a																23427.3
